# Supplementary material for: Isotopic constraints on atmospheric sulfate formation pathways in the Mt. Everest region, southern Tibetan Plateau
Source: Copernicus journal article supplement (doi:10.5194/acp-21-8357-2021), 2021-06-01
Supplement: Supplementary file [file acp-21-8357-2021-supplement-title-page.pdf › acp-21-8357-2021-supplement-title-page.pdf]

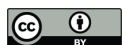

*Supplement of*

**Isotopic constraints on atmospheric sulfate formation pathways  
in the Mt. Everest region, southern Tibetan Plateau**

**Kun Wang et al.**

*Correspondence to:* Shohei Hattori ([hattori.s.ab@m.titech.ac.jp](mailto:hattori.s.ab@m.titech.ac.jp), [shohato@gmail.com](mailto:shohato@gmail.com)) and Shichang Kang ([shichang.kang@lzb.ac.cn](mailto:shichang.kang@lzb.ac.cn))

- [acp-21-8357-2021-supplement-title-page.pdf](#)
- [FigureS1.pdf](#)
- [Supplement\\_raw data \(2\).xlsx](#)

The copyright of individual parts of the supplement might differ from the article licence.
